# Supplementary material
Source: Springer Nature journal article supplement (https://www.springerprofessional.de/resource/supplementary/13638_2010_56_MOESM4_ESM.pdf/11897354)

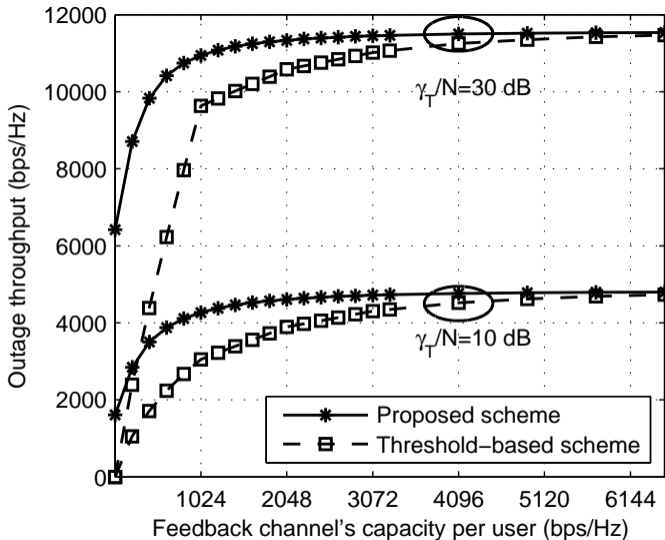

Supplement: MOESM4 [file 11897354]
